# Supplementary material
Source: PubMed Central journal article supplement (PMC3247979)
Supplement: supp_M111.307645_jbc.M111.307645-1.pdf [file supp_M111.307645_jbc.M111.307645-1.pdf]

## Figure S1

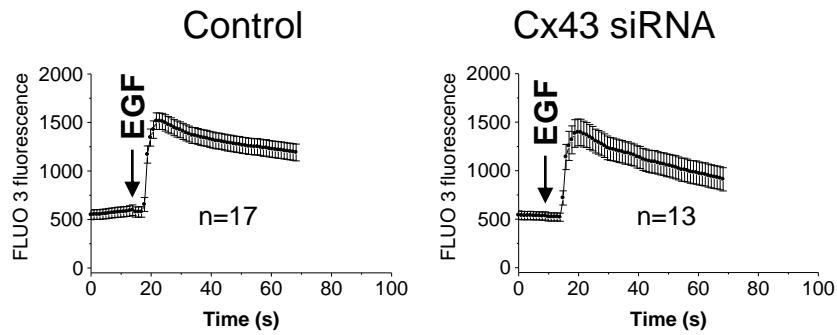

Figure S1. The effect of Cx43 knockdown on epidermal growth factor-induced  $[Ca^{2+}]_i$  increase in J774 cells. J774 cells were transfected with control or Cx43 siRNA and incubated with 48 h. After Fluo-3/AM loading, 50 nM EGF was added and Fluo 3 fluorescence was measured. Each line represents mean  $\pm$  S.E. of Fluo 3 fluorescence.
