# Supplementary material
Source: PubMed Central journal article supplement (PMC3247979)
Supplement: supp_M111.307645_jbc.M111.307645-2.pdf [file supp_M111.307645_jbc.M111.307645-2.pdf]

## Figure S2

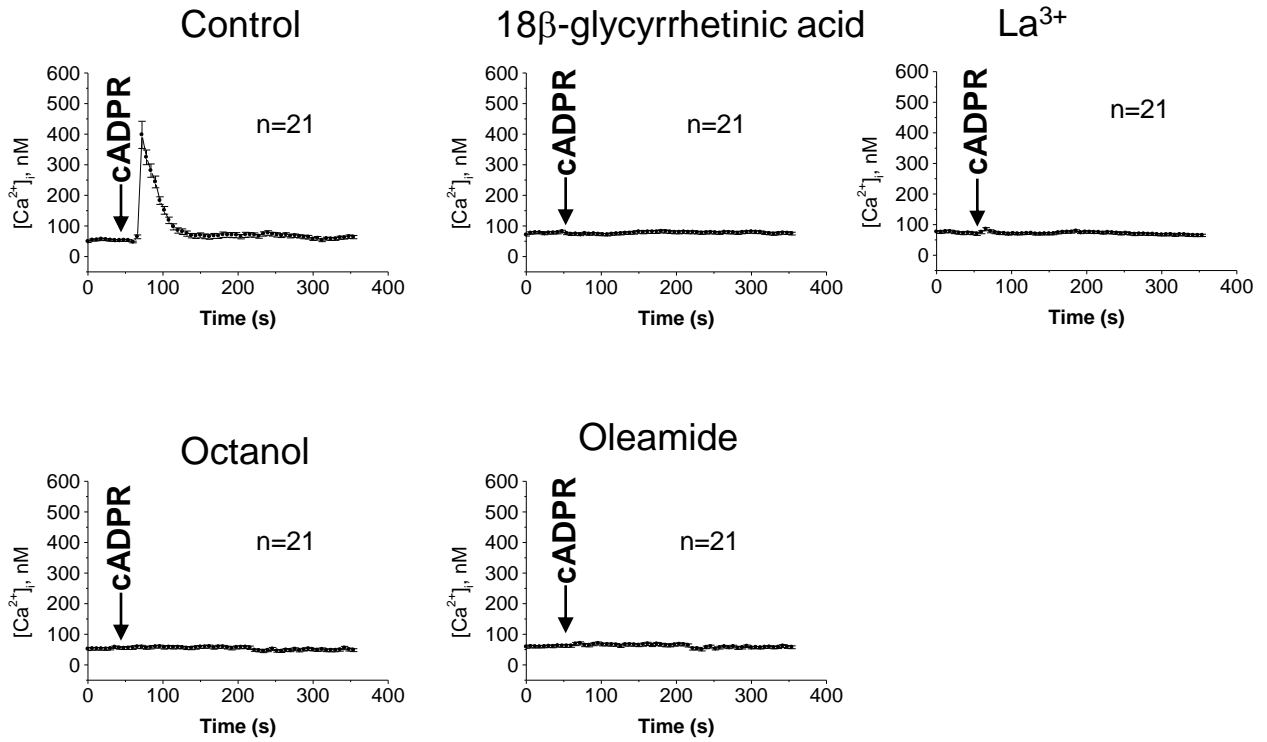

Figure S2. The effect of Cx43 hemichannel blockers on cADPR-induced  $[Ca^{2+}]_i$  increase in J774 cells. cADPR was added to Fluo-3/AM-loaded J774 cells that were pretreated with 100  $\mu$ M 18 $\beta$ -glycyrrhethinic acid, 1 mM lanthanum chloride, 1 mM octanol and 50  $\mu$ M oleamide for 15 min.  $[Ca^{2+}]_i$  changes were measured using a confocal microscope. Each line represents mean  $\pm$  S.E. of  $[Ca^{2+}]_i$ .
